# Supplementary material for: Preservation of DNA in nuclease-rich samples using magnetic ionic liquids
Source: Royal Society of Chemistry journal article supplement (doi:10.1039/c6ra05932e), 2016-01-01
Supplement: c6ra05932e1.pdf [file c6ra05932e1.pdf]

## Supporting Information

### Preservation of DNA in Nuclease-rich Samples using Magnetic Ionic Liquids

Kevin D. Clark,<sup>a</sup> Matthew Sorensen,<sup>b</sup> Omprakash Nacham<sup>a</sup> and Jared L. Anderson\*<sup>a</sup>

<sup>a</sup> Department of Chemistry, Iowa State University, Ames, IA 50011, USA.

<sup>b</sup> Department of Chemistry, Gustavus Adolphus College, St. Peter, MN 56082, USA.

#### Table of Contents

|                                   |     |
|-----------------------------------|-----|
| Synthesis of MILs                 | S2  |
| Recovery of sDNA                  | S2  |
| PCR Conditions                    | S2  |
| Transformations and Cell Cultures | S2  |
| Figure S1                         | S3  |
| Figure S2                         | S4  |
| Figure S3                         | S5  |
| Table S1                          | S6  |
| Figure S4                         | S7  |
| Figure S5                         | S8  |
| Figure S6                         | S9  |
| Figure S7                         | S10 |
| Figure S8                         | S11 |
| Figure S9                         | S12 |
| Figure S10                        | S13 |
| References                        | S14 |

**Synthesis of MILs.** The synthesis of the  $[P_{66614}^+][FeCl_4^-]$ ,  $[N_{888Bn}^+][FeCl_3Br^-]$ , and  $[P_{66614}^+]_2[MnCl_4^{2-}]$  MILs were adapted from previously reported procedures.<sup>1,2</sup> For the  $[P_{66614}^+][FeCl_4^-]$  and  $[P_{66614}^+]_2[MnCl_4^{2-}]$  MILs, equimolar quantities of the  $[P_{66614}^+][Cl^-]$  and iron(III) chloride hexahydrate ( $FeCl_3 \cdot 6H_2O$ ) or manganese(II) chloride tetrahydrate ( $MnCl_2 \cdot 4H_2O$ ), respectively, were stirred in methanol for 24 h. The methanol was then evaporated *in vacuo* and the crude product washed with  $5 \times 40$  mL of deionized water. Residual solvent was removed *in vacuo*. For preparation of the  $[N_{888Bn}^+][FeCl_3Br^-]$  MIL, 8 mmol of trioctylamine and 10 mmol of benzyl bromide were dissolved in chloroform under reflux conditions for 72 h. Chloroform was removed by rotovap and excess starting material removed by washing the crude product with  $5 \times 40$  mL of hexane to yield  $[N_{888Bn}^+][Br^-]$ . After drying in a vacuum oven, the bromide salt was reacted with 12 mmol of  $FeCl_3 \cdot 6H_2O$  in methanol for 24 h. The methanol was then removed *in vacuo* and the product washed with  $5 \times 40$  mL of deionized water. The product was finally dried *in vacuo*.

**Recovery of sDNA.** Recovery of sDNA from the MIL phase was undertaken using a previously reported solid phase extraction (SPE) procedure.<sup>3</sup> The MIL sample containing DNase I and sDNA was dissolved in 1 mL of 3 M potassium acetate and loaded onto a silica column. sDNA was eluted from the column using 10 mM Tris, 0.1 mM EDTA (pH 8.5) and precipitated with absolute ethanol. Purified sDNA was reconstituted in 20  $\mu$ L of 10 mM Tris (pH 8.5) and analyzed by agarose gel electrophoresis.

**PCR Conditions.** The total reaction volume for all PCR experiments was 50  $\mu$ L. Forward and reverse primers with sequences of 5'-TGC TGT TCC AGG GAC CT-3' and 5'-GAA TTC GGA TCC GGA CGC-3' were added to the mixture at final concentrations of 0.2  $\mu$ M. A custom PCR buffer<sup>4</sup> consisting of 80 mM Tris, 1 mM EDTA, 400 ng  $\mu$ L<sup>-1</sup> ovalbumin, 1X Phusion HF buffer, an additional 1 mM  $MgCl_2$ , 5 mM dNTPs, and 1 U of high fidelity Phusion DNA polymerase. The reaction mixture was diluted to 50  $\mu$ L with deionized water. Temperature settings for PCR were as follows: initial denaturation at 95 °C for 5 minutes followed by 30 cycles of denaturation at 95 °C for 30 s, annealing at 54 °C for 45 s, and extension at 72 °C for 45 s. Final extension was employed at 72 °C for 5 min and the samples then cooled to 4 °C.

**Transformations and Cell Cultures.** A 0.5  $\mu$ L aliquot of sample containing pDNA, DNase I, and the  $[P_{66614}^+]_2[MnCl_4^{2-}]$  MIL was transferred to a microcentrifuge tube containing 20  $\mu$ L of competent *E. coli* cells and placed on ice for 30 min. The sample was then subjected to heat shock for 30 s at 42 °C, removed from the heat source, and immediately placed on ice for 5 min. The cells were suspended in 950  $\mu$ L of SOC media and incubated for 1 h at 37 °C. A 250  $\mu$ L aliquot of the transformed cells was then spread on Luria Bertani agar (100  $\mu$ g mL<sup>-1</sup> carbenicillin). The plate was incubated overnight at 37 °C.

$^1\text{H NMR}$  ( $\text{CDCl}_3$ , 1 % v/v TMS, 400 MHz)

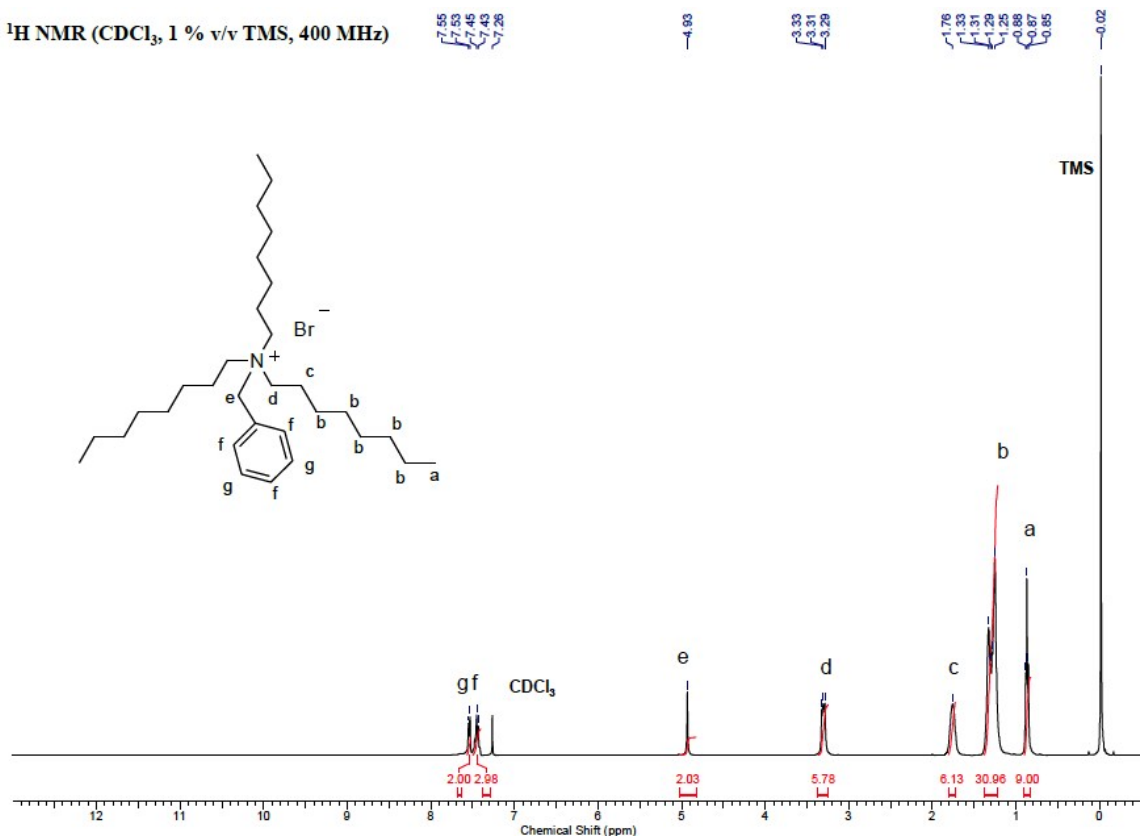

Figure S1.  $^1\text{H NMR}$  for  $[\text{N}_{888}\text{Bn}^+][\text{Br}^-]$ .

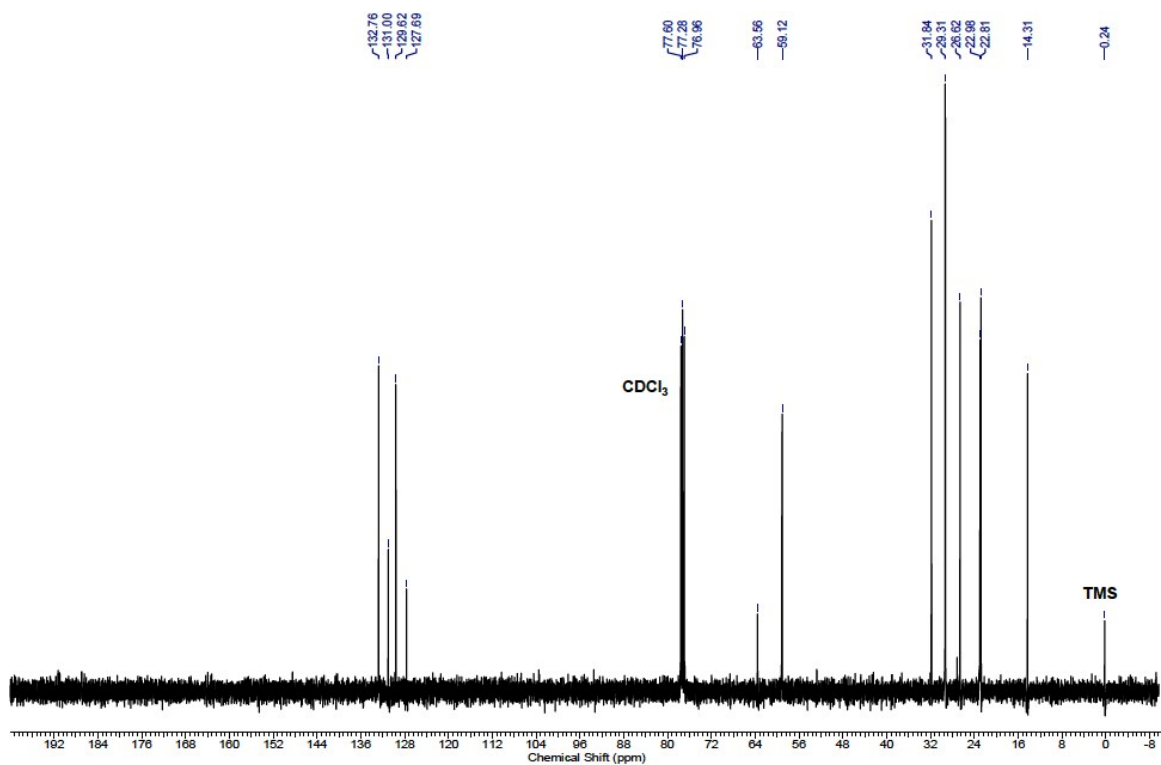

Figure S2. <sup>13</sup>C NMR of [N<sub>888</sub>Bn<sup>+</sup>][Br<sup>-</sup>].

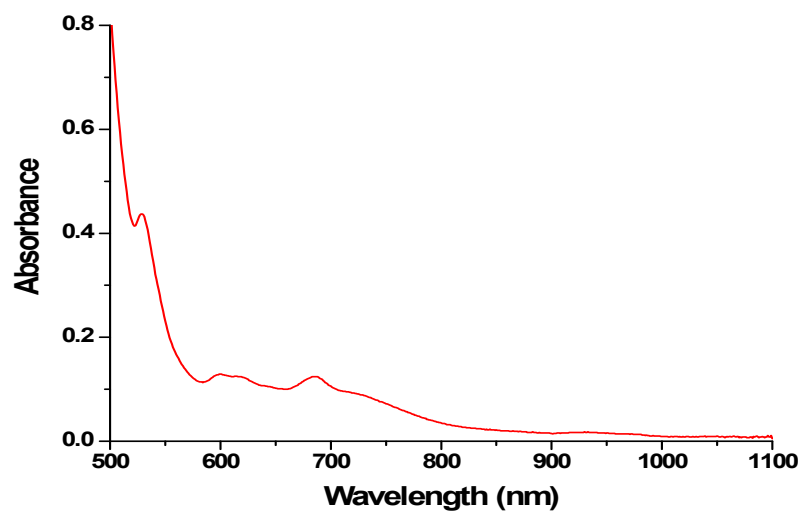

Figure S3. Absorption spectrum for the [N<sub>888Bn</sub><sup>+</sup>][FeCl<sub>3</sub>Br<sup>-</sup>] MIL in methanol.

Table S1. Phase transition behavior of the three studied MILs.

| MIL                                                     | $T_g/^\circ\text{C}^a$ |
|---------------------------------------------------------|------------------------|
| $[\text{P}_{66614}^+][\text{FeCl}_4^-]$                 | $-71^b$                |
| $[\text{N}_{888\text{Bn}}^+][\text{FeCl}_3\text{Br}^-]$ | $-53^c$                |
| $[\text{P}_{66614}^+]_2[\text{MnCl}_4^{2-}]$            | $-69^b$                |

<sup>a</sup>Glass transition temperatures ( $T_g$ ) as determined by differential scanning calorimetry (DSC). <sup>b</sup>From reference 1. <sup>c</sup>From reference 2.

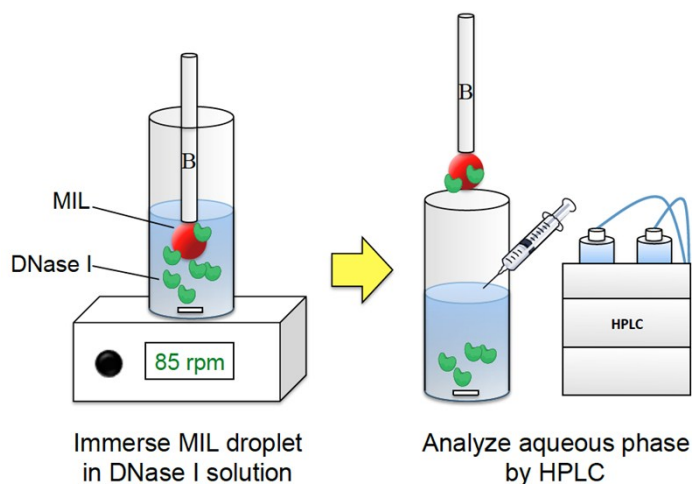

Figure S4. Schematic representation of SDE experiments for the determination of DNase I partitioning behavior between aqueous solution and the hydrophobic MIL phase. Extraction conditions: MIL volume: 20  $\mu\text{L}$ ; sample volume: 1.25 mL; buffer composition: 10 mM Tris (pH 8.5); DNase I concentration: 1,000  $\mu\text{g mL}^{-1}$ ; stir rate: 85 rpm.

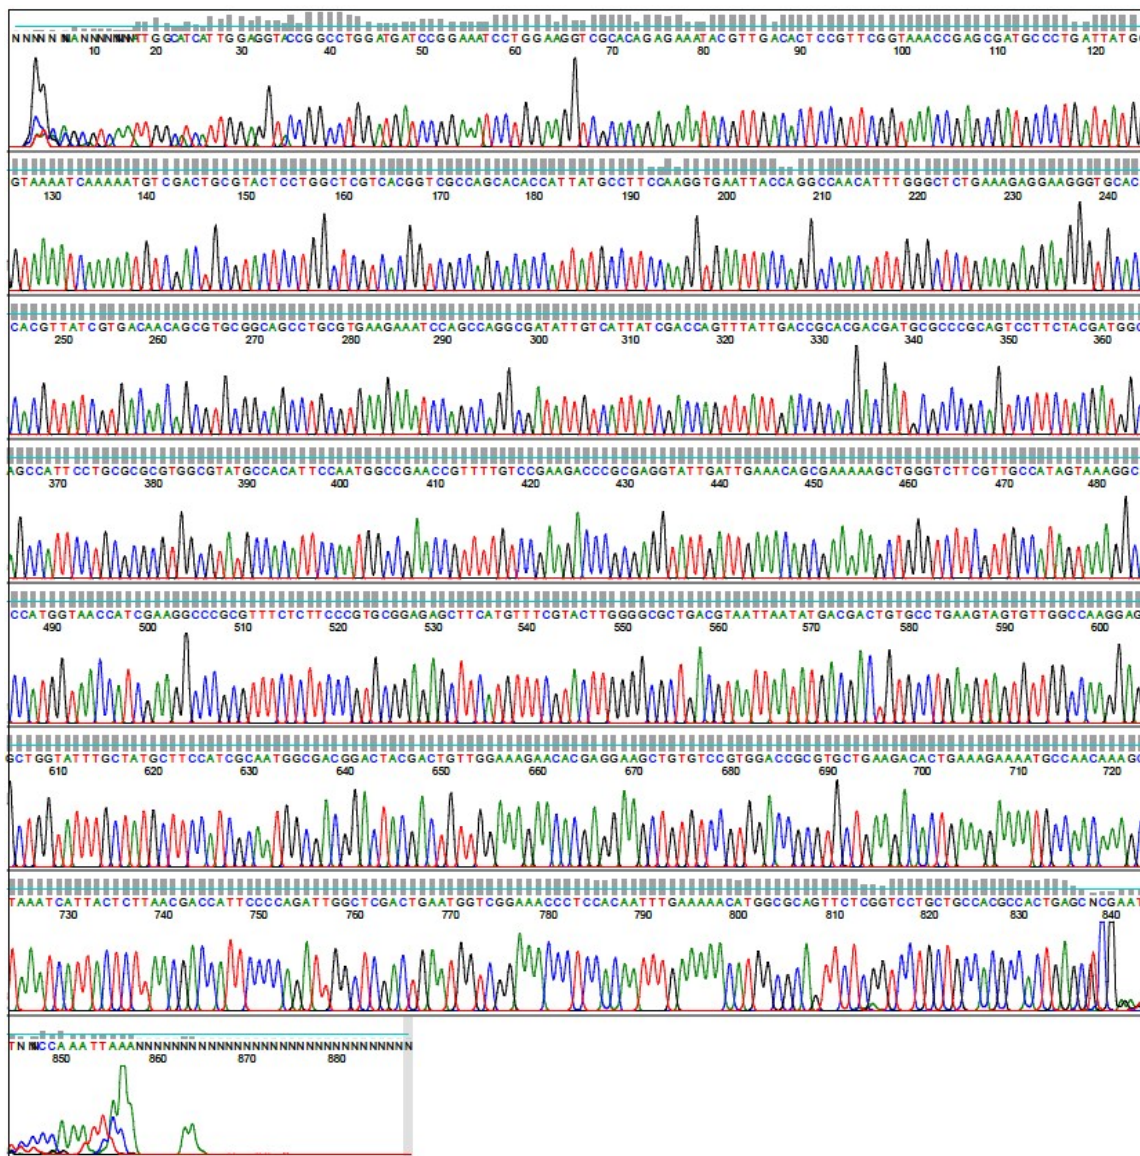

Figure S5. DNA sequencing results of the MTAP gene amplified from pDNA template. Prior to amplification, pDNA was stored in the  $[P_{66614}^+][FeCl_4^-]$  MIL with 20 U of DNase I for 72 h at room temperature.



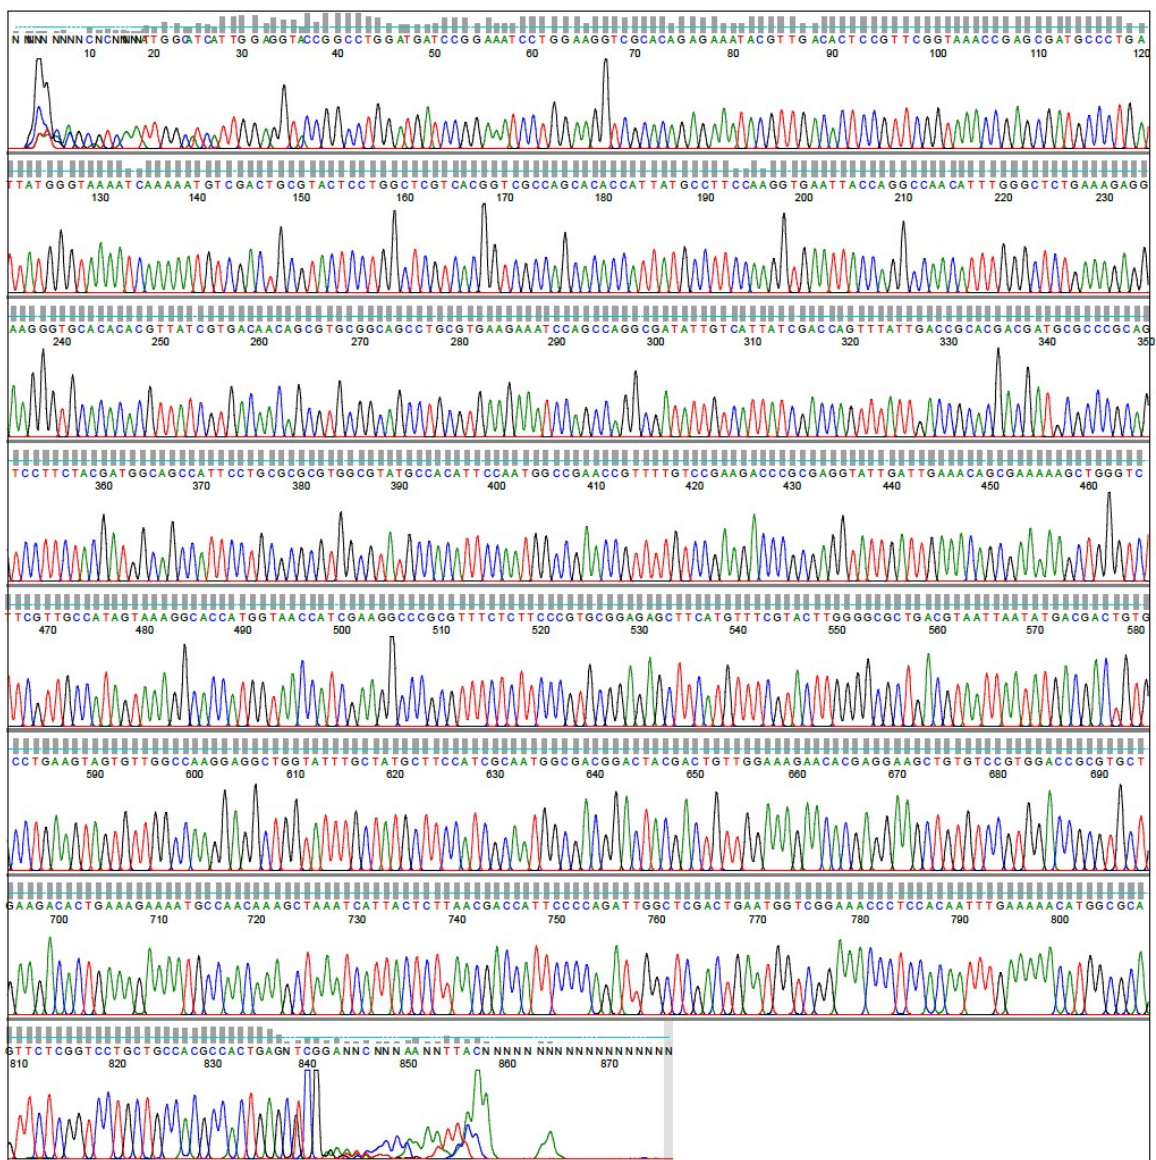

Figure S6. DNA sequencing results of the MTAP gene amplified from pDNA template. Prior to amplification, pDNA was stored in the  $[\text{N}_{888\text{Bn}}^+][\text{FeCl}_3\text{Br}^-]$  MIL with 20 U of DNase I for 72 h at room temperature.



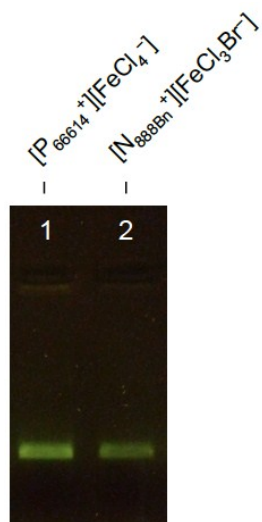

Figure S8. PCR amplification of the 879 bp MTAP gene from pDNA stored within MIL for 72 h and room temperature. Initially, 5  $\mu$ g of pDNA were spiked into 20  $\mu$ L of MIL and incubated for 1 h at room temperature prior to the addition of 20 U of DNase I.

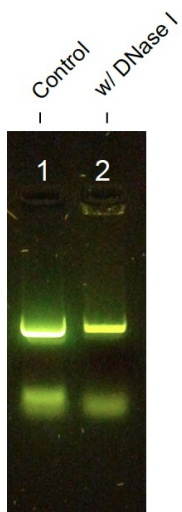

Figure S9. PCR amplification of the 879 bp MTAP gene from pDNA template. Lane 1 shows a standard and lane 2 shows the amplicon obtained from a PCR mixture spiked with 1 U of DNase I immediately prior to thermal cycling.

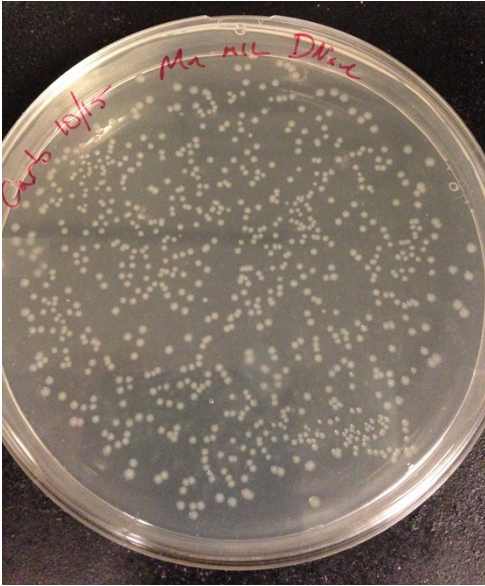

Figure S10. Colonies on a carbenicillin selection plate after transformation of competent *E. coli* cells with pDNA treated with DNase I within the  $[P_{66614}^+]_2[MnCl_4^-]$  MIL. The mixture was incubated for 1 day at room temperature prior to heat shock transformation.

## References

1. R. E. Del Sesto, T. M. McCleskey, A. K. Burrell, G. A. Baker, J. D. Thompson, B. L. Scott, J. S. Wilkes and P. Williams, *Chem. Commun.*, 2008, DOI: 10.1039/B711189D, 447-449.
2. O. Nacham, K. D. Clark, H. Yu and J. L. Anderson, *Chem. Mater.*, 2015, **27**, 923-931.
3. K. D. Clark, O. Nacham, H. Yu, T. Li, M. M. Yamsek, D. R. Ronning and J. L. Anderson, *Anal. Chem.*, 2015, **87**, 1552-1559.
4. K. D. Clark, M. M. Yamsek, O. Nacham and J. L. Anderson, *Chem. Commun.*, 2015, **51**, 16771-16773.
